# Supplementary figures and images for: Naringenin Ameliorates Renovascular Hypertensive Renal Damage by Normalizing the Balance of Renin-Angiotensin System Components in Rats
Source: PubMed Central journal article supplement — Int J Med Sci. 2019 May 7;16(5):644–53. doi: 10.7150/ijms.31075 (PMC6566737; doi:10.7150/ijms.31075), 2019-05-07

**A**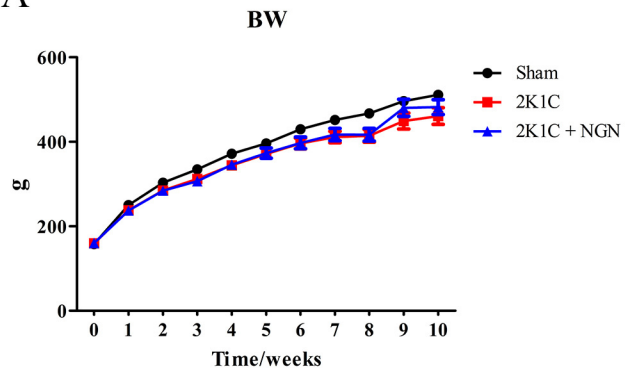**B**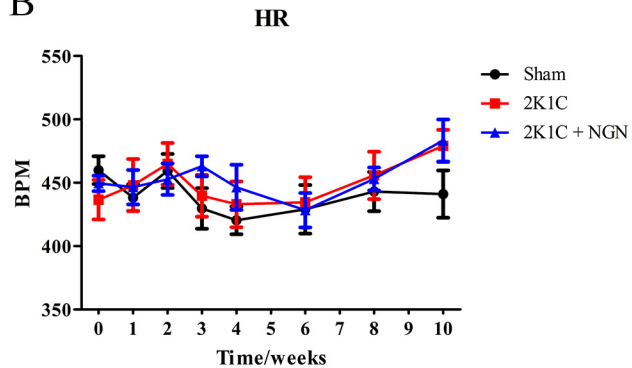

Figure S1

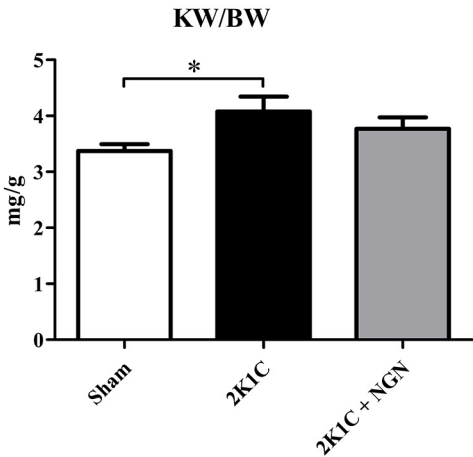

Figure S2

Supplement: ijmsv16p0644s1.pdf [file ijmsv16p0644s1.pdf]
